# Supplementary material for: Microfluidic fabrication of complex-shaped microfibers by liquid template-aided multiphase microflow
Source: Royal Society of Chemistry journal article supplement (doi:10.1039/c0lc00711k), 2011-01-01
Supplement: c0lc00711k.pdf [file c0lc00711k.pdf]

## Supplementary Information

### Microfluidic fabrication of complex shaped microfibers by liquid template-aided multiphase microflow

Chang-Hyung Choi,<sup>a</sup> Hyunmin Yi,<sup>b</sup> Sora Hwang,<sup>a</sup> David A. Weitz,<sup>c</sup> and Chang-Soo Lee<sup>\*,a</sup>

<sup>a</sup> Department of Chemical Engineering, Chungnam National University, Yuseong-gu, Daejeon, 305-764, South Korea; E-mail: rhadum@cnu.ac.kr

<sup>b</sup> Department of Chemical and Biological Engineering, Tufts University, Medford, Massachusetts 02155, U.S.A.

<sup>c</sup> School of Engineering and Applied Sciences, Department of Physics, Harvard University, Cambridge, Massachusetts 02138, U.S.A.

#### 1. Configuration and notations of the engulfing for the generation of hollow microfibers

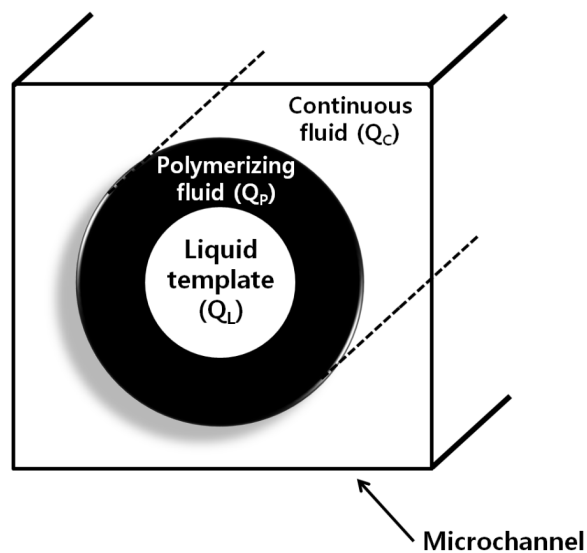

**Fig. S1** Schematic diagram describing cross-sectional view of core-shell jet and illustrating immiscible continuous fluid (outer phase), polymerizing fluid (middle phase), and liquid template (inner phase) in the microchannel.

**2. Compositions and physical characteristics of fluids at the case of formation of engulfing flow**

Table. S1 Compositions and physical characteristics of each phase used for formation of engulfing flow

| Phase                                | Composition                                      | Density (g/ml) | Viscosity at 20°C | Interfacial tension (mN/m)        | Spreading coefficient* |
|--------------------------------------|--------------------------------------------------|----------------|-------------------|-----------------------------------|------------------------|
| Liquid template (Q <sub>L</sub> )    | 100% PEGDA (M <sub>n</sub> =575)                 | 1.1            | 55                | $\gamma_{LC} = 2.9 \pm 0.02$      | S <sub>L</sub> = -2.3  |
| Polymerizing fluid (Q <sub>P</sub> ) | 50 wt% PEGDA, 42 wt% water and 8 wt% Darocur1173 | 0.78           | 15                | $\gamma_{LP} = \text{negligible}$ | S <sub>P</sub> = 2.9   |
| Continuous fluid (Q <sub>C</sub> )   | 95 wt% Hexadecane and 5 wt% span 80              | 1.1            | 8                 | $\gamma_{PC} = 0.6 \pm 0.01$      | S <sub>C</sub> = -3.5  |

\*Spreading coefficient are calculated by  $S_L = \gamma_{PC} - (\gamma_{LP} + \gamma_{LC})$ ;  $S_P = \gamma_{LC} - (\gamma_{LP} + \gamma_{PC})$ ;  $S_C = \gamma_{LP} - (\gamma_{LC} + \gamma_{PC})$ .

### 3. Thermodynamic values among three phases for the prediction of microfiber geometries

There are three possible configurations in the equilibrium state: when  $S_L$  is negative value, (i) conditions induce core-shell (completely engulfing) morphology, with the liquid template fluid appearing as the core within a shell of polymerizing fluid; (ii) conditions correspond to stratified jetting; and (iii) conditions describe separated jetting.

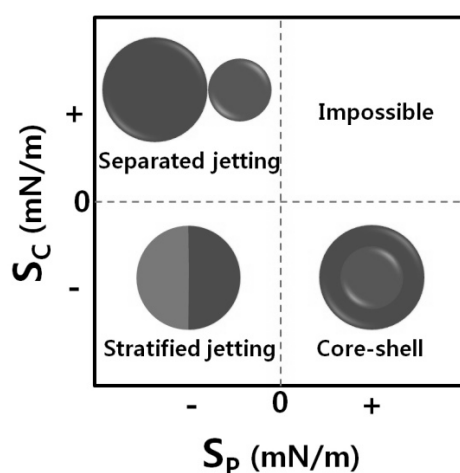

Fig. S2 Schematic diagram of possible configurations corresponding to each spreading coefficient ( $S_P$  and  $S_C$ ) when  $S_L$  is always negative value.

Table. S2 Interfacial tensions measured at various experimental conditions of fluids. The estimated spreading coefficient provides information of prediction of microfiber morphologies

| $Q_C$<br>(continuous fluid)          | $Q_P$<br>(polymerizing fluid)         | $Q_L$<br>(liquid template) | Interfacial tension (mN/m)                                                                     | Spreading coefficient                | Estimated Morphology               | Observed Morphology                |
|--------------------------------------|---------------------------------------|----------------------------|------------------------------------------------------------------------------------------------|--------------------------------------|------------------------------------|------------------------------------|
| 95 wt% hexadecane with 5 wt% span 80 | 50% PEG-DA, 42wt% water and 8wt% DEAP | 100 wt% PEG-DA             | $\gamma_{LP}$ = negligible<br>$\gamma_{LC}$ = $2.9 \pm 0.02$<br>$\gamma_{PC}$ = $0.6 \pm 0.01$ | $S_L < 0, S_P > 0, S_C < 0$          | Engulfing flow (hollow microfiber) | Engulfing flow (hollow microfiber) |
|                                      |                                       | 80 wt% PEG-DA              | $\gamma_{LP}$ = negligible<br>$\gamma_{LC}$ = out of range<br>$\gamma_{PC}$ = $0.6 \pm 0.01$   | $S_L \leq 0, S_P \approx 0, S_C < 0$ | Engulfing flow (hollow microfiber) | Engulfing flow (hollow microfiber) |
|                                      |                                       | 60 wt%                     | $\gamma_{LP}$ = negligible                                                                     | $S_L < 0, S_P > 0, S_C < 0$          | Engulfing flow                     | Engulfing flow                     |

|                              |                            |                                                                                    |   |                                             |                                       |                                       |
|------------------------------|----------------------------|------------------------------------------------------------------------------------|---|---------------------------------------------|---------------------------------------|---------------------------------------|
|                              | PEG-DA                     | negligible<br>$Y_{LC}$<br>$0.9 \pm 0.45$<br>$Y_{FC}$<br>$0.6 \pm 0.01$<br>$Y_{LP}$ | = |                                             | (hollow microfiber)                   | (hollow microfiber)                   |
|                              | 40 wt%<br>PEG-DA           | negligible<br>$Y_{LC}$<br>$1.8 \pm 0.03$<br>$Y_{FC}$<br>$0.6 \pm 0.01$<br>$Y_{LP}$ | = | $S_L < 0, S_P > 0, S_C <$                   | Engulfing flow<br>(hollow microfiber) | Engulfing flow<br>(hollow microfiber) |
|                              | 20 wt%<br>PEG-DA           | negligible<br>$Y_{LC}$<br>$2.6 \pm 0.07$<br>$Y_{FC}$<br>$0.6 \pm 0.01$<br>$Y_{LP}$ | = | $S_L < 0, S_P > 0, S_C <$                   | Engulfing flow<br>(hollow microfiber) | Engulfing flow<br>(hollow microfiber) |
|                              | 0 wt%<br>PEG-DA<br>(water) | negligible<br>$Y_{LC}$<br>$2 \pm 0.12$<br>$Y_{FC}$<br>$0.6 \pm 0.01$<br>$Y_{LP}$   | = | $S_L < 0, S_P > 0, S_C <$                   | Engulfing flow<br>(hollow microfiber) | Engulfing flow<br>(hollow microfiber) |
| 92% PEG-<br>DA, 8wt%<br>DEAP | 100 wt%<br>PEG-DA          | negligible<br>$Y_{LC}$<br>$2.9 \pm 0.02$<br>$Y_{FC}$<br>$2.9 \pm 0.12$             | = | $S_L \approx 0, S_P \approx 0, S_C \approx$ | Stratified Jetting                    | Stratified Jetting                    |

#### 4. The evolution of hollow microfiber geometries

We further provide more detailed results of hollow microfiber for the results shown in Figure 2 as shown below in Figure S2. The detailed information of evolution of hollow microfiber is investigated with sequential optical images and SEM images. The increase of evolution time along the microchannel will place the cocentric core structure from excentered core region. In early evolution state (1st state), mechanical strength of the hollow fiber is relatively low because one side of fiber is much thinner than opposite side. From second state to third state, while polymerized hollow fiber retain own structures, the position of hole still is not placed in the center. Finally, symmetric hollow microfiber can be produced using fully developed engulfing jets at fourth state.

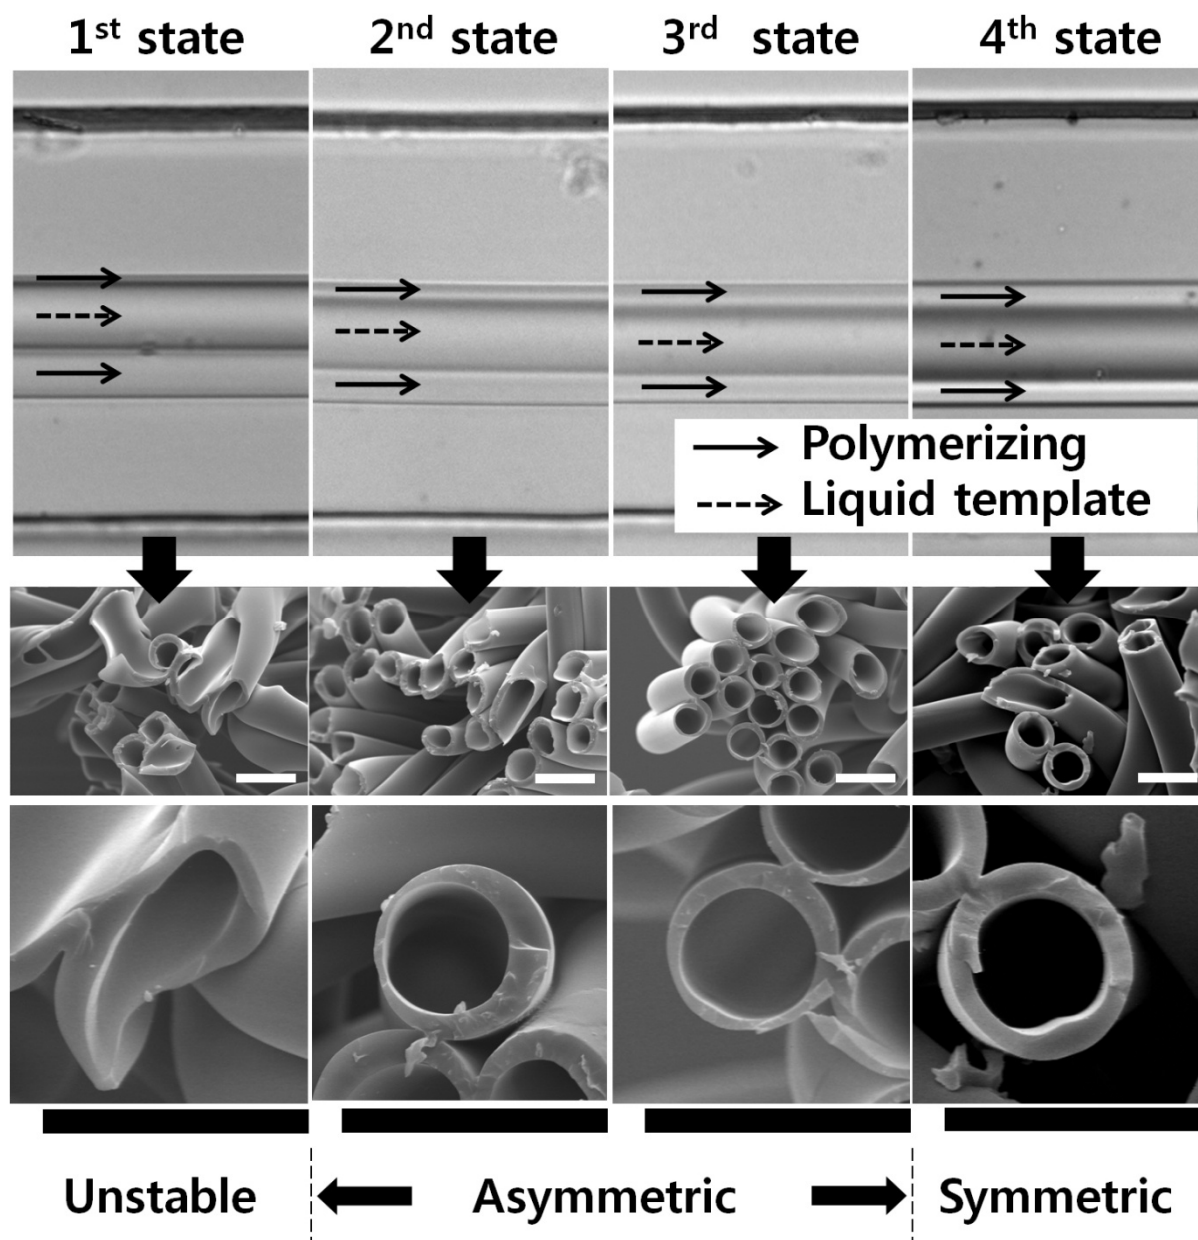

**Fig. S3** Polymerized hollow microfibers at different evolution states upon UV exposure as shown in Figure 1B. Scale bars represent 50  $\mu\text{m}$ .
